# Supplementary material for: Proteomic landscape of the primary somatosensory cortex upon sensory deprivation
Source: PubMed Central journal article supplement (PMC5632293; doi:10.1093/gigascience/gix082), 2017-08-23

## Proteomic landscape of the primary somatosensory cortex upon sensory deprivation

Koen Kole<sup>1,2\*</sup>, Rik G.H. Lindeboom<sup>3\*</sup>, Marijke P.A. Baltissen<sup>3</sup>, Pascal W.T.C. Jansen<sup>3</sup>, Michiel Vermeulen<sup>3</sup>, Paul Tiesinga<sup>2</sup>, Tansu Celikel<sup>1</sup>

(1) Department of Neurophysiology, (2) Department of Neuroinformatics, Donders Institute for Brain, Cognition, and Behaviour, Radboud University, Nijmegen - the Netherlands. (3) Department of Molecular Biology, Radboud Institute for Molecular Life Sciences, Radboud University, Nijmegen - the Netherlands

\* indicates equal contribution

E-mail addresses (in the order of appearance): [k.kole@neurophysiology.nl](mailto:k.kole@neurophysiology.nl),  
[r.lindeboom@science.ru.nl](mailto:r.lindeboom@science.ru.nl), [m.baltissen@science.ru.nl](mailto:m.baltissen@science.ru.nl), [p.jansen@science.ru.nl](mailto:p.jansen@science.ru.nl),  
[michiел.vermeulen@science.ru.nl](mailto:michiел.vermeulen@science.ru.nl), [p.tiesinga@science.ru.nl](mailto:p.tiesinga@science.ru.nl), [celikel@neurophysiology.nl](mailto:celikel@neurophysiology.nl)  
(corresponding author)

### Abstract

**Background:** Experience-dependent plasticity (EDP) powerfully shapes neural circuits by inducing long-lasting molecular changes in the brain. Molecular mechanisms of EDP have been traditionally studied by identifying single or small subsets of targets along the biochemical pathways that link synaptic receptors to nuclear processes. Recent technological advances in large-scale analysis of gene transcription and translation now allow systematic observation of thousands of molecules simultaneously. Here we employed label-free quantitative mass spectrometry to address experience-dependent changes in the proteome after sensory deprivation of the primary somatosensory cortex.

**Findings:** Cortical column- and layer-specific tissue samples were collected from control animals, with all whiskers intact, and animals whose C-row whiskers were bilaterally plucked for 11-14 days. 33 samples from cortical layers (L) 2/3 and L4 spanning across control, deprived, 1st and 2nd order spared columns yielded at least 10,000 peptides mapping to ~5000 protein groups. Of these, 4,676 were identified with high confidence and >3000 are found in all samples.

**Conclusions:** This comprehensive database provides a snapshot of the proteome after whisker deprivation, a protocol that has been widely used to unravel the synaptic, cellular and network mechanisms of EDP. Complementing the recently made available transcriptome for identical experimental conditions (see accompanying article by Kole et al), the database can be used to (1) mine novel targets whose translation is modulated by sensory organ use, (2) cross-validate experimental protocols from the same developmental time point, and (3) statistically map the molecular pathways of cortical plasticity at a columnar and laminar resolution.

**Keywords:** Barrel cortex, whisker plucking, juvenile mice, mass-spectrometry, label-free quantification, proteomics

## Data Description

### Context

Sensory experience shapes neural circuits throughout life via experience-dependent plasticity (EDP). Changes in neural circuits, in turn, allow the brain to adapt to recent sensory, motor and perceptual experiences of animals in their ever-changing environments.

The rodent barrel cortex, a subfield of the primary somatosensory cortex, processes sensory information originating from whiskers. Each cortical (barrel) column receives majority of its sensory input from one (so called principal) whisker, anatomically delineating the neural circuits associated with each whisker. Taking advantage of this organizational principle, previous studies have shown that targeted deprivation of select whiskers result in weakening of the sensory evoked responses in synaptic projections originating from barrel cortical layer (L)4 and targeting L2/3 in an experience-dependent manner [1, 2]. In contrast, corresponding projections in the neighbouring sparing whiskers' cortical columns are strengthened [3]. The molecular mechanisms of EDP, however, are still largely unknown. Understanding how sensory experience shapes neuronal circuits will benefit from systematic analysis of the transcriptome and proteome following altered sensory experience. In an accompanying manuscript we have provided a snapshot of the transcriptomic changes after 11-12 days long sensory deprivation resolved across cortical columns and layers (Kole et al, submitted). The database presented herein employs the same sensory deprivation protocol but focuses on the proteomic changes across cortical layers of L4 and L2/3 in columnar resolution.

### Methods

**Animals:** All experiments were performed in accordance with NIH Guidelines for the Care and

1  
2  
3  
4 Use of Laboratory Animals, and were approved by the Animal Ethics Committee of the Radboud  
5  
6 University in Nijmegen, the Netherlands. Pregnant wild type mice (C57Bl6; Charles River, stock  
7  
8 number 000664 [RRID:NCBITaxon\_10090] were kept at a 12 hour light/dark cycle with access to  
9  
10 food *ad libitum*. Cages were checked for birth daily. Experience-dependent plasticity was induced  
11  
12 as described previously (Kole et al, submitted). Briefly, at P12, C-row whiskers were plucked  
13  
14 under isoflurane anaesthesia while control animals were not plucked but anaesthetized and  
15  
16 handled similarly (**Figure 1A**). Animals across groups were housed together with their mothers  
17  
18 until tissue collection at P23-P26.  
19  
20  
21  
22  
23  
24

25 [Figure 1 comes about here]  
26  
27  
28  
29  
30

31 ***Slice preparation and sample collection:*** Tissue samples were collected from acute brain slices  
32  
33 as described before [4]. In short, pups were deeply anaesthetized using isoflurane and perfused  
34  
35 with ice-cold carbogenated slicing medium before 400  $\mu$ m thalamocortical slices [1] were  
36  
37 prepared. Slices were incubated in carbogenated aCSF at 37 degrees Celcius for 30 min before  
38  
39 they were transferred to a holding chamber containing carbogenated aCSF in room temperature.  
40  
41 Slices remained in this chamber until cortical layers and columns were isolated within ~5-40 min.  
42  
43  
44 For sample isolation, slices were placed under a microscope equipped with Dodt gradient  
45  
46 contrast, used for visualization of the granular segments of the live neocortical tissue, such as the  
47  
48 L4 in the barrel cortex. Visualized cortical columns (A-E) were separated from each other using a  
49  
50 pulled pipette (Sutter Instruments P-2000), tip size of ~5 micrometers, serving as a microneedle.  
51  
52 Layers (L) 2/3 and L4 were isolated based on the established contrast criteria commonly used in  
53  
54 electrophysiological analysis of barrel cortical neurons in acute slices [1,2].  
55  
56  
57  
58  
59  
60  
61  
62  
63  
64  
65

1  
2  
3  
4 In the barrel cortex, cortical columns can be grouped by their relative distance to each other.  
5  
6 Cortical columns B and D, for example, are named as the 1st order neighboring cortical columns  
7  
8 in respect to the C row column. Similarly A and E row columns constitute the 2nd order  
9  
10 neighboring columns. To increase the sample yield and have single animal resolution for the  
11  
12 proteomic mapping, we pooled the samples within each layer across B and D, and A and E  
13  
14 columns. Immediately after dissection, tissue samples were placed in Eppendorf tubes, snap  
15  
16 frozen in liquid nitrogen and stored at -80°C until further use.  
17  
18  
19

20 In the control group, tissues were collected from three separate mice (biological replicates)  
21  
22 whereas the deprived group consisted of four animals. Only C-row layers were sampled in the  
23  
24 control animals, as the comparison across the C-rows between control and deprived animals allow  
25  
26 to directly address the molecular changes associated with the whisker deprivation. Due to the  
27  
28 small tissue sizes, obtaining successful LC-MS runs was technically challenging. Thus, not all  
29  
30 laminar samples from all cortical columns are retained for the full analysis (See **Supplemental**  
31  
32 **Table 1** for the distribution of samples across groups). In addition to these biological replicates,  
33  
34 we ran 10 of the samples a second time, providing 10 technical replicates.  
35  
36  
37

38 ***Lysate preparation and protein digestion:*** Samples were prepared for mass spectrometry  
39  
40 using the filter-aided sample preparation (FASP) method, as described before [5] (**Figure 1B**).  
41  
42 Briefly, mouse brain tissues were homogenized in lysis buffer (4% w/v SDS, 100 mM Tris/HCl and  
43  
44 0.1 M DTT, pH 7.6) and incubated at 95 °C for 3 min. To shear DNA and reduce sample viscosity,  
45  
46 samples were ultrasonicated. Samples were then clarified by centrifugation, after which the  
47  
48 proteins in the extract were denatured using urea buffer (8M urea, 0.1 M Tris/HCl, pH  
49  
50 8.5) and centrifuge-filtered using 30 kDa filters (Microcon YM-30). After washing with urea buffer  
51  
52 (pH 8.0), proteins were alkylated with iodoacetamide, followed by washing with ammonium  
53  
54 bicarbonate. Trypsin (Promega Cat#V5280) was applied to digest the extracted proteins. The  
55  
56 resulting peptides were then collected by centrifugation and desalted using C18 (Empore)  
57  
58  
59  
60  
61  
62  
63  
64  
65

1  
2  
3  
4 StageTips. Given the small sample size protein yield was not determined before moving on to  
5  
6 mass spectrometry.  
7

8  
9 **Mass spectrometry:** Tryptic peptides were separated on an Easy-nLC 1000 (Thermo,  
10 [RRID:SCR\_014993]) using a 214 minute long gradient of acetonitrile (7% to 30%) followed by  
11 washes at 60%, followed by 95% acetonitrile for 240 min of total data collection. Mass spectra  
12 were collected on a LTQ-Orbitrap Fusion Tribrid mass spectrometer (Thermo, [RRID:  
13 SCR\_014992]) in data-dependent top-speed mode with dynamic exclusion set at 60 s. Precursor  
14 MS spectra are acquired at an m/z range of 400-1500 at a resolution of 120.000 and a target  
15 value of 300000 ions per full scan in the Orbitrap. MS/MS spectra are acquired in HCD mode  
16 using 35% collision energy and fragmentation spectra are recorded in the ion trap.  
17

18  
19 **Data processing:** Raw data was analysed using MaxQuant ([RRID:SCR\_014485]) version  
20 1.5.1.0. with match-between-runs, label-free quantification and intensity based absolute  
21 quantification (iBAQ) enabled. Dependent peptides were enabled to perform an unbiased search  
22 against modifications on the identified peptides. The RefSeq protein sequence database  
23 downloaded on 28-06-2016 was used to identify proteins. Identified proteins were filtered for  
24 reverse hits and common contaminants. Contaminant proteins were determined by the MaxQuant  
25 software suite and include proteins that are often introduced during a typical mass spectrometry  
26 experiment such as keratins and trypsin. All other processing was performed in MATLAB  
27 ([RRID:SCR\_001622]) or R ([RRID:SCR\_001905]) programming languages.  
28  
29  
30  
31  
32  
33  
34  
35  
36  
37  
38  
39  
40  
41  
42  
43  
44  
45  
46  
47  
48  
49  
50  
51

### 52 **Data validation and quality control**

53  
54 Peptides were assigned to protein groups based on shared peptide sequences, the majority of  
55 which consist mainly of unique peptide sequences (71%, **Figure 2A**). Razor peptides (i.e.  
56 peptides that can be assigned to more than one protein but are assigned to the protein group with  
57  
58  
59  
60  
61  
62  
63  
64  
65

1  
2  
3  
4 the most other peptides, i.e. Occam's razor principle) on average made up 13% of the designated  
5  
6 protein groups; non-unique peptides on average constituted 16%. When testing how much of the  
7  
8 total and theoretically observable protein sequence length was identified by the analyses, we  
9  
10 observe for most proteins a good coverage of the theoretically observable peptides (44% on  
11  
12 average, **Figure 2B**). Complete sequence coverage is never achieved, likely because of the  
13  
14 remaining tryptic peptides being too long or too short to be measured by mass spectrometry.  
15  
16 Since high numbers of peptide modifications and adducts can interfere with accurate protein  
17  
18 quantification, we assessed the types of peptide modifications that we could observe on the  
19  
20 identified peptides (**Figure 2C** and **2D**). Peptide modifications may occur in vivo but more likely  
21  
22 arise during the sample preparation steps. Reassuringly, the majority of peptides (98.33%) were  
23  
24 found to be unmodified. For 0.96% of the peptides we found a modified form with an unannotated  
25  
26 mass shift, while 0.65% of peptides was modified and had a mass shift that could be annotated  
27  
28 to a known peptide modification (**Figure 2C**). In total we could identify 25 different types of peptide  
29  
30 modifications (**Figure 2D**). Of these, the top three modifications were deamidation (38.94%),  
31  
32 oxidation (15.53%) and loss of ammonia (15.48%), which are all common peptide modifications.  
33  
34 Next, we addressed the data quality for individual samples, which showed that on average 23,489  
35  
36 unique amino acid sequences (ranging from 13,095 to 72,418) could be identified per sample  
37  
38 (**Figure 2E**); the majority of these (>98%) could be assigned to regular protein groups, excluding  
39  
40 reverse hits, contaminants or peptides identified only by modification. Reverse hit rate (i.e. false  
41  
42 discovery rate) or the number of proteins that could only be identified based on a modified peptide  
43  
44 was never higher than 0.7%, suggesting high confidence of protein identification. Additionally, the  
45  
46 number of potential contaminants was low for all samples (minimum, 29; first quartile, 33; median,  
47  
48 35; mean, 34.52; third quartile, 36; maximum, 38), suggesting high sample purity (**Figure 2F**).  
49  
50  
51  
52  
53  
54  
55  
56  
57  
58

59 [Figure 2 is about here]  
60  
61  
62  
63  
64  
65

1  
2  
3  
4  
5  
6  
7 Of the designated protein groups (i.e. protein groups with a Posterior Error Probability (PEP,  
8 confidence of peptide identification) of  $<0.01$ ,  $n = 6,245$ ), over 3,000 could be reliably identified in  
9 all of our samples (**Figure 3A** and **3B**); peptides in 4,676 protein groups could be identified with  
10 high confidence (PEP  $<0.0002$ ). Of all identified proteins, 90% of the total protein content (as  
11 determined by intensity based absolute quantification [7]) was contained in the 979 most abundant  
12 proteins (**Figure 3C**). In this dataset we identified and quantified proteins over five orders of  
13 magnitude, suggesting high sensitivity even at low protein concentrations.  
14  
15  
16  
17  
18  
19  
20  
21  
22  
23  
24  
25

26 [Figure 3 is about here]  
27  
28  
29  
30

31 To estimate the variance in protein quantification across samples, we averaged the number of  
32 identified peptides per protein group, which showed similar distributions across experimental  
33 groups (**Figure 3D**). Additionally we have performed two different normalizations: 1) Averaging  
34 the LFQ intensity and copy number of each protein (as quantified according to the “proteomic  
35 ruler” approach [6], which uses the signal intensities of measured histones as an internal  
36 normalization) of each protein across samples within groups (**Figure 3E,F**, respectively), and 2)  
37 calculating the total LFQ intensity or protein mass across proteins within each sample and  
38 averaging across independent samples within a group (**Figure 3G,H**, respectively). In the former,  
39 we included only those proteins that had a protein copy number of non-zero. The results showed  
40 that independent of the method of quantification the experimental groups were similar to each  
41 other, suggesting that comparisons within protein groups between experimental groups should  
42 not be hampered by systematic differences in (inferred) protein abundances. Calculating the total  
43 mass of identified proteins per cell (by dividing inferred protein copy numbers per cell by  
44  
45  
46  
47  
48  
49  
50  
51  
52  
53  
54  
55  
56  
57  
58  
59  
60  
61  
62  
63  
64  
65

1  
2  
3  
4 Avogrado's number and multiplying by protein mass in kDa) showed that L2/3 cells on average  
5 contain 18.42 ±0.78 picograms of identified protein; this was 12.29 ±1.28 picograms in L4 cells (p  
6 = 0.0004, Student's t-test) (**Figure 3H**). The number of identified proteins averaged per group  
7 across layers did not differ (p=0.6964, unpaired Student's t-test). Since protein identification rates  
8 are likely to be independent from cortical layer identity, these results suggests that total protein  
9 levels per cell are lower in L4. To investigate how the two quantification methods (i.e. LFQ and  
10 proteomic ruler approach) correspond, we examined the correlation between LFQ intensities and  
11 protein copy numbers (**Supplemental Figure 1**). The correlation ( $R^2$ ) between the two  
12 quantification methods ranged from 0.76 to 0.80, suggesting good consensus of protein  
13 abundance estimation.  
14  
15  
16  
17  
18  
19  
20  
21  
22  
23  
24  
25  
26  
27  
28  
29

30 We then assessed the distributions of molecular mass (kDa) and amino acid sequence length of  
31 the proteins identified in our samples. On average, proteins were 71.65 ±82.77 kDa in mass  
32 (**Figure 4A**) and had a mean length of 643.63 ±745.27 amino acids (**Figure 4B**). To exclude any  
33 bias in protein abundance estimation based on protein length, we plotted mass or sequence  
34 length against LFQ intensities or estimated protein copy number [5]. This showed only weak, if  
35 any, correlations ( $R^2$  values  $< \sim 0.005$ ) between LFQ intensity or copy number and peptide mass  
36 or length, suggesting proteins of all sizes are equally well identified (**Figure 4C, D, E, F**).  
37  
38  
39  
40  
41  
42  
43  
44  
45  
46  
47

48 [Figure 4 is about here]  
49  
50  
51  
52  
53

54 Next, we examined the variance between samples by calculating the coefficient of variation  
55 (CV) of inferred protein copy numbers [6] (**Figure 5A**). About 73% of proteins showed a CV of  
56 45% or less, on average. We then employed principal component analysis (PCA), which showed  
57  
58  
59  
60  
61  
62  
63  
64  
65



1  
2  
3  
4 that 72.5% of variance was explained by PC1 and 2, and that samples were clustered mostly by  
5  
6 cortical layer (**Figure 5B,C**). These analyses were repeated for identified peptides for each protein  
7  
8 group in individual samples, using different cut-offs of identified peptides (**Figure 3D**). When no  
9  
10 cut-off was used (i.e. including proteins identified by at least one peptide, see Figure 3D for the  
11  
12 distribution across all groups), on average 73.88% of proteins showed a CV of 30% or less  
13  
14 (**Supplemental Figure 2A**); With a cut-off of 10 identified peptides, a CV of 15% or less was  
15  
16 found for 70.74% of proteins (**Supplemental Figure 2B**). PCA using both of these cutoffs showed  
17  
18 that samples cluster mostly around C column-derived samples. Principal components (PC) 1 and  
19  
20 2 explained 77.6% and 86.5% of variance, depending on the cut-off value used (**Supplemental**  
21  
22 **Figure 2C-F**).

23  
24  
25  
26  
27  
28  
29 [Figure 5 is about here]  
30  
31  
32  
33  
34

35 Since our dataset contains several technical duplicates, we asked how well they correlate with  
36  
37 the biological replicates and compared identified peptides per protein group and protein copy  
38  
39 numbers of biological and technical replicates (**Figure 6**). Biological samples and their direct  
40  
41 technical replicates were highly correlated ( $R^2 \geq 0.89$ , **Figure 6A-Ca,c**), which was also found for  
42  
43 the remaining pairwise comparisons ( $R^2 \geq 0.90$ ) (**Supplemental Figure 3, 4**). These results  
44  
45 suggest that samples are highly comparable in terms of peptide and protein counts, and that  
46  
47 sequential nature of the mass spectroscopy does not systematically, or in statistically appreciably  
48  
49 fashion, bias protein quantifications, at least in our samples.  
50  
51

52  
53  
54  
55  
56  
57 [Figure 6 is about here]  
58  
59  
60  
61  
62  
63  
64  
65

## Re-use potential

The current dataset provides a proteomics view of the experience-dependent plasticity in the mouse barrel cortex. Since barrel cortex is a popular model system where sensory processing and experience-dependent plasticity are studied from molecules to behavior [e.g. 1-3, 8, 10,12,13], this resource should help to identify some of the molecular underpinnings of cortical plasticity. Given the relatively high anatomical resolution at which samples were collected, the current dataset would also be beneficial in the understanding of molecular constituents of cortical laminar identity and function. It should be noted however that the collected samples contain the entirety of the cellular population, *i.e.* are not cell type-specific. Signals originating from all cell types are thus averaged, which should be considered by researchers reusing this dataset. The cellular complexity of the samples studied herein will be particularly useful for those efforts aiming to identify the neuronal as well as the non-neuronal basis of experience dependent plasticity.

A combinatorial approach between proteomics and transcriptomics (e.g. RNA sequencing; Kole et al., submitted) is a promising outlook that could help identifying those molecular targets that are essential for reorganization of neural networks following sensory deprivation. Proteomics data can aid to broaden the scope of findings from transcriptomics studies as it can provide novel insights into post-transcriptional regulation of protein expression, the time course of protein expression (since proteins typically have a longer half-life than RNAs) and posttranslational modifications that could orchestrate specific protein functions.

Only a few studies are available that focus on large-scale molecular changes in neural circuits following sensory deprivation [9–10]. As large-scale molecular techniques are becoming more accessible, studies employing them to investigate the molecular bases of plasticity are likely to

1  
2  
3  
4 follow suit. The phenotype of EDP in barrel cortex depends heavily on the experimental approach  
5 used (e.g. enrichment vs. deprivation, single whisker experience vs. whole row deprivation,  
6 developmental time points [12, 13]). The current dataset should prove useful to validate, expand  
7 and compare the findings of molecular studies employing different protocols. Moreover,  
8 comparing our dataset with those obtained from other brain regions (e.g. visual cortex, auditory  
9 cortex), would help to determine where previously observed differences in plasticity across  
10 different brain [13] regions might arise.  
11  
12  
13  
14  
15  
16  
17  
18  
19  
20  
21

### 22 **Availability of the supporting data**

23  
24  
25 Data supporting this work are available in the GigaScience repository, GigaDB [14]. The raw  
26 mass spectrometry proteomics data have been deposited in the ProteomeXchange Consortium  
27 via the PRIDE partner repository [15] with the dataset identifier PXD005971.  
28  
29  
30  
31

### 32 **List of abbreviations**

33  
34  
35 EDP Experience dependent plasticity  
36

37  
38 L2/3 Cortical Layer 2/3, also known as supragranular layers  
39

40  
41 L4 Cortical Layer 4, i.e. granular layer  
42

### 43 **Ethics approval and consent to participate**

44  
45  
46 Not applicable.  
47

### 48 **Consent for publication**

49  
50  
51 Not applicable  
52

### 53 **Competing interests**

54  
55  
56  
57 The authors declare no competing interests.  
58  
59  
60  
61  
62  
63  
64  
65

1  
2  
3  
4 **Funding**  
5  
6

7 The current work was funded by the Faculty of Science of the Radboud University, Nijmegen, the  
8 Netherlands (grant number 626830 – 6200821) as well as the ALW Open Programme of the  
9 Netherlands Organization for Scientific Research (NWO; grant number 824.14.022).  
10

11  
12  
13 **Author contributions**  
14

15 KK performed all experimental manipulations, sample acquisition and prepared the tables and  
16 figures, performed bioinformatic analysis. RL performed bioinformatic analysis and prepared the  
17 tables and figures. PJ and MB performed sample preparation and mass spectrometry. MV  
18 supervised the proteomics pipeline. PT co-supervised the project. TC designed and supervised  
19 the project, performed bioinformatic analysis. KK and TC wrote the manuscript. All authors  
20 edited otherwise approved the final version of the manuscript.  
21  
22  
23  
24  
25  
26  
27

28  
29 **References**  
30  
31

- 32 1. Allen CB, Celikel T, Feldman DE (2003) Long-term depression induced by sensory  
33 deprivation during cortical map plasticity in vivo. *Nat Neurosci* 6:291–9. doi:  
34 10.1038/nn1012  
35  
36  
37  
38  
39 2. Celikel T, Szostak VA, Feldman DE (2004) Modulation of spike timing by sensory  
40 deprivation during induction of cortical map plasticity. *Nat Neurosci* 7:534–41. doi:  
41 10.1038/nn1222  
42  
43  
44  
45  
46 3. Clem RL, Celikel T, Barth AL (2008) Ongoing in vivo experience triggers synaptic  
47 metaplasticity in the neocortex. *Science* 319:101–4. doi: 10.1126/science.1143808  
48  
49  
50  
51 4. Kole K, Komuro Y, Provaznik J, Pistolic J, Benes V, Tiesinga P, Celikel T. Transcriptional  
52 mapping of the primary somatosensory cortex upon sensory deprivation . *GigaScience*.  
53  
54  
55  
56 2017 (In Press)  
57  
58  
59  
60  
61  
62  
63  
64  
65

- 1  
2  
3  
4 5. Wiśniewski JR, Zougman A, Nagaraj N, Mann M (2009) Universal sample preparation  
5 method for proteome analysis. *Nat Methods* 6:359–362. doi: 10.1038/nmeth.1322  
6  
7  
8
- 9 6. Wiśniewski JR, Hein MY, Cox J, Mann M (2014) A “Proteomic Ruler” for Protein Copy  
10 Number and Concentration Estimation without Spike-in Standards. *Mol Cell Proteomics*  
11 13:3497–3506. doi: 10.1074/mcp.M113.037309  
12  
13  
14  
15
- 16 7. Schwanhäusser B, Busse D, Li N, Dittmar G, Schuchhardt J, Wolf J, Chen W, Selbach  
17 M (2011) Global quantification of mammalian gene expression control. *Nature* 473:337–  
18 342. doi: 10.1038/nature10098  
19  
20  
21  
22
- 23 8. Zeisel A, Munoz-Manchado AB, Codeluppi S, Lonnerberg P, La Manno G, Jureus A,  
24 Marques S, Munguba H, He L, Betsholtz C, Rolny C, Castelo-Branco G, Hjerling-Leffler  
25 J, Linnarsson S (2015) Cell types in the mouse cortex and hippocampus revealed by  
26 single-cell RNA-seq. *Science* (80- ) 347:1138–1142. doi: 10.1126/science.aaa1934  
27  
28  
29  
30  
31
- 32 9. Butko MT, Savas JN, Friedman B, Delahunty C, Ebner F, Yates JR, Tsien RY (2013) In  
33 vivo quantitative proteomics of somatosensory cortical synapses shows which protein  
34 levels are modulated by sensory deprivation. *Proc Natl Acad Sci U S A* 110:E726-35.  
35 doi:10.1073/pnas.1300424110/DCSupplemental.www.pnas.org/cgi/doi/10.1073/pnas.1  
36 300424110  
37  
38  
39  
40  
41  
42  
43
- 44 10. Vallès A, Boender AJ, Gijsbers S, Haast R a M, Martens GJM, de Weerd P (2011)  
45 Genomewide analysis of rat barrel cortex reveals time- and layer-specific mRNA  
46 expression changes related to experience-dependent plasticity. *J Neurosci* 31:6140–58.  
47 doi: 10.1523/JNEUROSCI.6514-10.2011  
48  
49  
50  
51  
52
- 53 11. Fernández-Montoya J, Buendia I, Martin YB, Egea J, Negrodo P, Avendaño C (2016)  
54 Sensory Input-Dependent Changes in Glutamatergic Neurotransmission- Related  
55  
56  
57  
58  
59  
60  
61  
62  
63  
64  
65

1  
2  
3  
4 Genes and Proteins in the Adult Rat Trigeminal Ganglion. *Front Mol Neurosci* 9:132. doi:  
5  
6 10.3389/fnmol.2016.00132  
7

- 8  
9 12. Feldman DE, Brecht M (2005) Map plasticity in somatosensory cortex. *Science*  
10 310:810–5. doi: 10.1126/science.1115807  
11  
12 13. Fox K, Wong ROL (2005) A comparison of experience-dependent plasticity in the visual  
13 and somatosensory systems. *Neuron* 48:465–77. doi: 10.1016/j.neuron.2005.10.013  
14  
15 14. Kole K, Baltissen M, Lindeboom R, Jansen P, Vermeulen M, Tiesinga P, Celikel T:  
16 Supporting data for "Proteomic landscape of the primary somatosensory cortex upon  
17 sensory deprivation" GigaScience Database. 2017. <http://dx.doi.org/10.5524/100336>  
18  
19  
20 15. Vizcaíno JA, Csordas A, del-Toro N, Dianas JA, Griss J, Lavidas I, Mayer G,  
21 PerezRiverol Y, Reisinger F, Ternent T, Xu QW, Wang R, Hermjakob H. (2016) 2016  
22 update of the PRIDE database and related tools. *Nucleic Acids Res.* 1;44(D1): D447-  
23 D456. doi: 10.1093/nar/gkv1145  
24  
25  
26  
27  
28  
29  
30  
31  
32  
33  
34  
35

## 36 Figure legends

37  
38  
39  
40  
41

### 42 **Figure 1. Overview of the experimental setup, sample collection and data organization.**

43  
44 **(A)** Pups were bilaterally spared or deprived of their C-row whiskers between P12 and P23-P26.  
45 Whisker deprivation, i.e. plucking, was repeated every third day to ensure that there was no  
46 regrowth of the whiskers. **(B)** Proteins were denatured and purified, followed by on-filter digestion  
47 into tryptic peptides, which were subsequently desalted on C18 StageTips and sequenced on a  
48 mass spectrometer. **(C)** Organization of data files in the database. Colours correspond to the  
49 colour code codes in Figures 2,3, and 5, as well as the MS output file among the Supplemental  
50 Data. Sample codes of 5 digits (e.g. A2.1.1.2) indicate a technical replicate of the sample listed  
51 above it (e.g. A2.1.1). See Supplemental Table 1 for mapping of samples to mouse IDs.  
52  
53  
54  
55  
56  
57  
58  
59  
60  
61  
62  
63  
64  
65

1  
2  
3  
4  
5  
6  
7 **Figure 2. Overview of protein groups, sequence coverage and peptide modifications. (A)**  
8  
9 Stack representation of designated protein groups with the mean contents of unique, razor and  
10 non-unique peptides represented in blue, yellow and red, respectively. **(B)** Sequence coverage of  
11 identified proteins was plotted as total protein sequence coverage against coverage of  
12 theoretically observable peptides (as determined by MaxQuant). **(C)** All identified peptides. **(D)**  
13 Identified peptide modifications with an annotated mass shift. **(E)** Submitted and identified MS  
14 spectra and uniquely identified amino acid sequences per sample. **(F)** Peptide and protein group  
15 identification confidence per sample. Colour coding corresponds to the experimental groups' in  
16 Figure 1C.  
17  
18  
19  
20  
21  
22  
23  
24  
25  
26  
27  
28  
29  
30

31 **Figure 3. Quantification of protein groups across all samples.** Control/Deprived, C column;  
32 1st order spared, B/D columns; 2nd order spared, A/E columns (see Figure 1). **(A)** Number of  
33 observations per protein group in the entire dataset. **(B)** Confidence of protein group identification  
34 across samples. **(C)** Protein content versus identified protein groups. For every protein group all  
35 measured iBAQ values are plotted in grey, with the median value in black. **(D)** Averages and  
36 variances of peptides per protein group in each experimental group. **(E)** Box plot of LFQ intensity  
37 averages across samples within each group. **(F)** Box plot of protein copy numbers per cell  
38 (inferred as in [6]) averaged across samples within experimental groups. **(G)** Summed LFQ  
39 intensities averaged within experimental groups. **(H)** Total mass of identified proteins per cell,  
40 averaged within experimental groups. The inferred protein copy number per cell was divided by  
41 Avogrado's number ( $6.0221409 \times 10^{23}$ ) and then multiplied by the protein mass in kilodaltons  
42 (kDa), yielding the total mass of identified proteins per cell.  
43  
44  
45  
46  
47  
48  
49  
50  
51  
52  
53  
54  
55  
56  
57  
58  
59  
60  
61  
62  
63  
64  
65

1  
2  
3  
4 **Figure 4. Protein quantification is independent from peptide mass or length.** Distributions of  
5  
6 **(A)** molecular mass and **(B)** amino acid sequence length; smaller and shorter proteins are the  
7  
8 most prevalent. When plotting peptide mass or length against protein LFQ intensity **(C, D)** or  
9  
10 protein copy number (inferred as in [6]) **(E, F)**, weak (if any, see  $R^2$  values on figures)  
11  
12 correlations are observed, suggesting that protein abundance estimation is not biased by peptide  
13  
14 mass or length (also see Figure 2B).  
15  
16  
17  
18  
19  
20  
21  
22  
23  
24  
25  
26  
27  
28  
29

30 **Figure 5. Variance quantification of individual samples.** **(A)** Cumulative plot of the coefficient  
31  
32 of variation (CV) of the inferred protein copy numbers [6] per cell and per experimental group. On  
33  
34 average, ~73% of proteins show a CV of 45% or less. **(B)** Principal Component Analysis (PCA)  
35  
36 based on inferred protein copy numbers per cell. Principal Component (PC) 1 and 2 explain ~73%  
37  
38 of variance, and samples cluster mostly based on cortical laminar origin. **(C)** Cumulative plot of  
39  
40 percent variance explained by each PC. The first 5 PCs explain 85% of the variance.  
41  
42  
43  
44  
45  
46

47 **Figure 6. Matrix of correlation coefficients of biological and technical replicates.** Data from  
48  
49 **(A)** all biological samples and their corresponding replicates combined across experimental  
50  
51 groups and cortical layers, **(B)** L2/3 **(C)** and L4. **(a, b)**. Scatter plots showing peptides per protein  
52  
53 group (a) or protein copy numbers (inferred copy numbers per cell [6], (b)) for biological samples  
54  
55 (X axis) and their technical replicates (Y axis). **(b, d)** Histograms showing differences in identified  
56  
57 peptides per protein group (b) or protein copy numbers (d) between biological and technical  
58  
59  
60  
61  
62  
63  
64  
65



1  
2  
3  
4 replicates. Note that across all samples, the variation between the biological sample and the  
5  
6 technical replicas are small, with Pearson  $R^2$  values between 0.89-96.  
7  
8  
9

10  
11  
12  
13  
14  
15  
16  
17 **Supplemental Figure 1. Correlation between LFQ and protein copy numbers.** Scatter plots  
18 of LFQ values (x axis) and inferred protein copy numbers [6] (y axis), showing a linear correlation  
19  
20 between the two quantification methods ( $R^2 > 0.75$ ).  
21  
22  
23  
24  
25  
26

27 **Supplemental Figure 2. Variance quantification of individual samples. (A, B)** Cumulative  
28 plots of the coefficient of variance (CV) in the number of identified peptides in each experimental  
29  
30 group. Including proteins with at least one identified peptide (A), CVs of 30% or less are found in  
31  
32 ~74%. With an increased cut-off (10 peptides) ~70% of proteins show a CV of 15% or less (C).  
33  
34  
35 **(C, D)** Principal component analysis (PCA) using numbers of identified peptides per protein. With  
36 a cut-off of 1 identified peptide, ~78% of variance is explained by Principal Component  
37  
38 (PC) 1 and 2 (B); this is ~87% when a cut-off of 10 identified peptides is used (D). **(E, F)**  
39  
40 Cumulative plots of showing the percent variance explained by each PC. With a cutoff of 1  
41  
42 identified peptide (C) the first 5 PCs explain ~83% of the variance; using a cutoff of 10 peptides  
43  
44  
45 (F) this is ~91%.  
46  
47  
48  
49  
50  
51  
52

53 **Supplemental Figure 3. Distribution of peptides per protein group in biological and**  
54 **technical replicates.** Scatter plots of identified peptides per protein group from biological and  
55  
56 technical replicates (See Figure 1C for coding). Red-bordered graphs indicate pairwise  
57  
58 comparisons between biological samples and their direct technical replicate; graphs with black  
59  
60  
61  
62  
63  
64  
65

1  
2  
3  
4 borders contain the remaining comparisons. Overall, a strong linear correlation is observed in  
5  
6 pairwise comparisons ( $R^2 = 0.95 \pm 0.01$ ), in particular between biological and technical replicate  
7  
8 pairs ( $R^2 \geq 0.96 \pm 0.01$ ). Scale bars correspond to 100 peptides per protein group.  
9

10  
11  
12  
13  
14  
15 **Supplemental Figure 4. Copy number distribution of biological and technical replicates.**

16  
17 Log-log plots showing protein copy numbers from biological and technical replicates. Pairwise  
18  
19 comparisons between biological samples and their direct technical replicate are indicated by red  
20  
21 borders; black borders indicate the remaining comparisons. As in **Supplemental Figure 2**,  
22  
23 pairwise comparisons show high correlations between individual samples (average  $R^2 = 0.90$   
24  
25  $\pm 0.01$ ), which is highest for biological and technical replicate pairs ( $R^2 = 0.93 \pm 0.03$ ).  
26  
27  
28  
29  
30  
31

32 **Supplemental Table 1. Origin and distribution of samples.** Colours correspond to those in  
33  
34 Figure 1C. Samples that were run once are marked X, technically duplicated samples are marked  
35  
36 XX.  
37  
38  
39  
40  
41

42 **Supplemental Table 2. R commands for PCA analysis and plots.**  
43  
44  
45  
46  
47  
48  
49  
50  
51  
52  
53  
54  
55  
56  
57  
58  
59  
60  
61  
62  
63  
64  
65

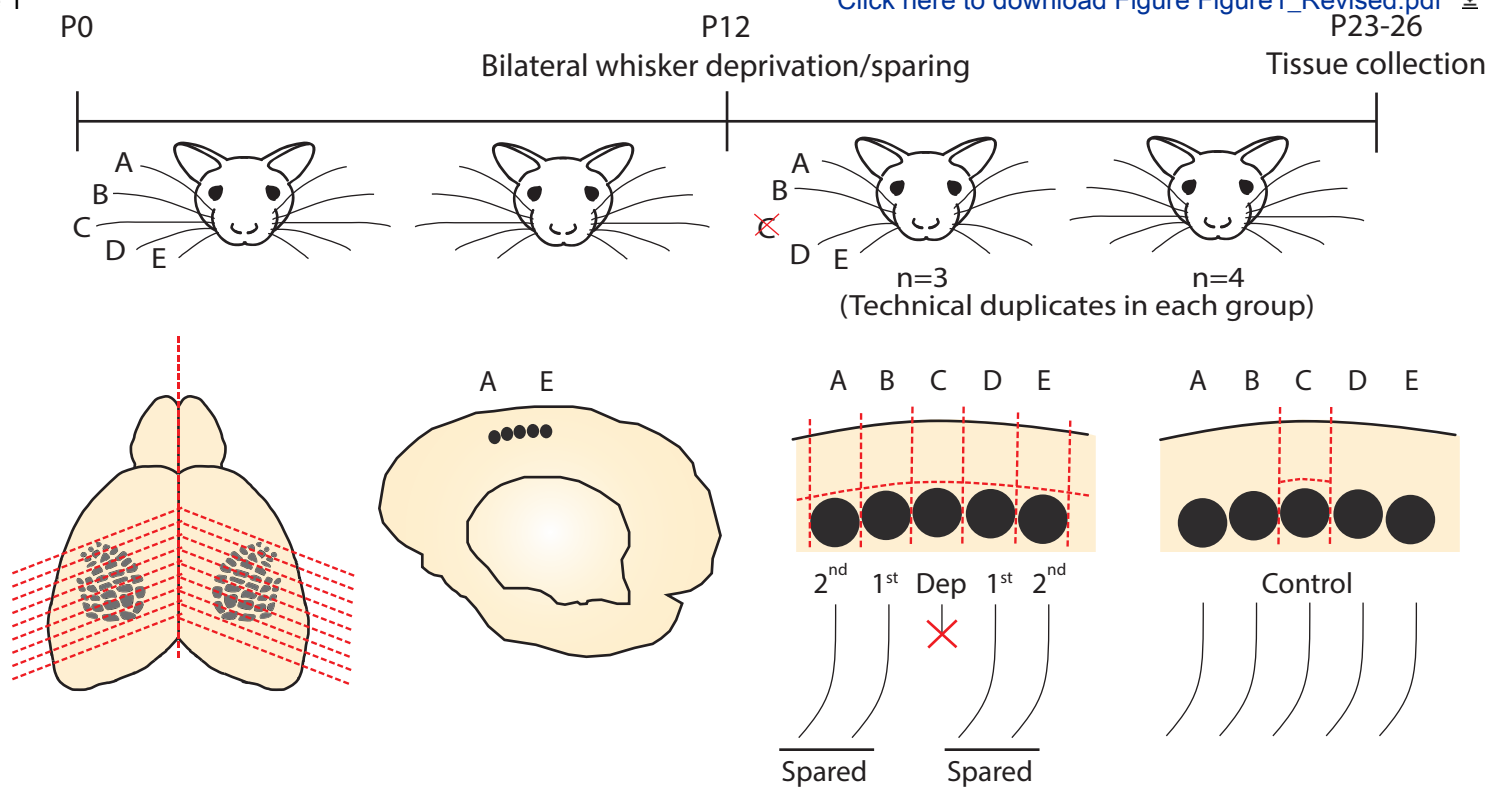

B

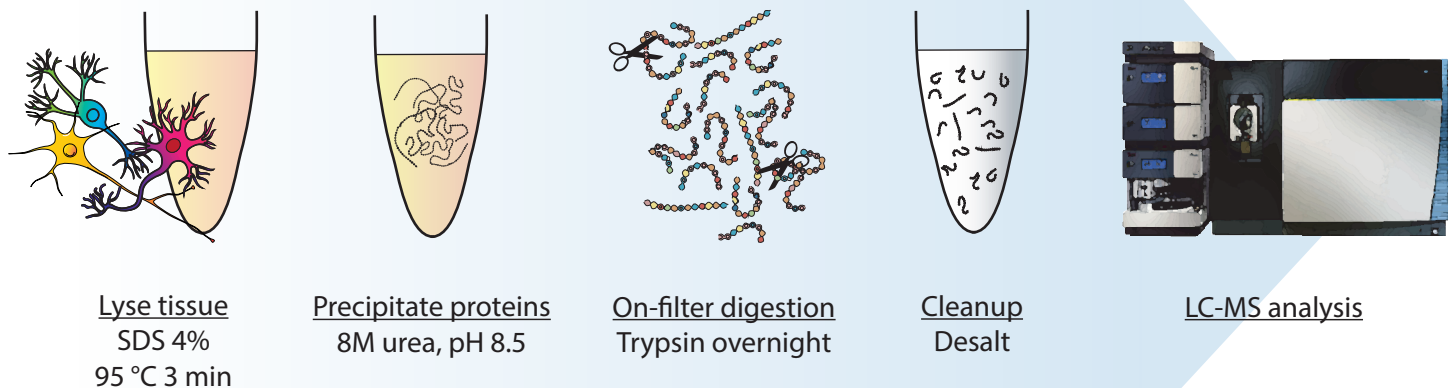

C

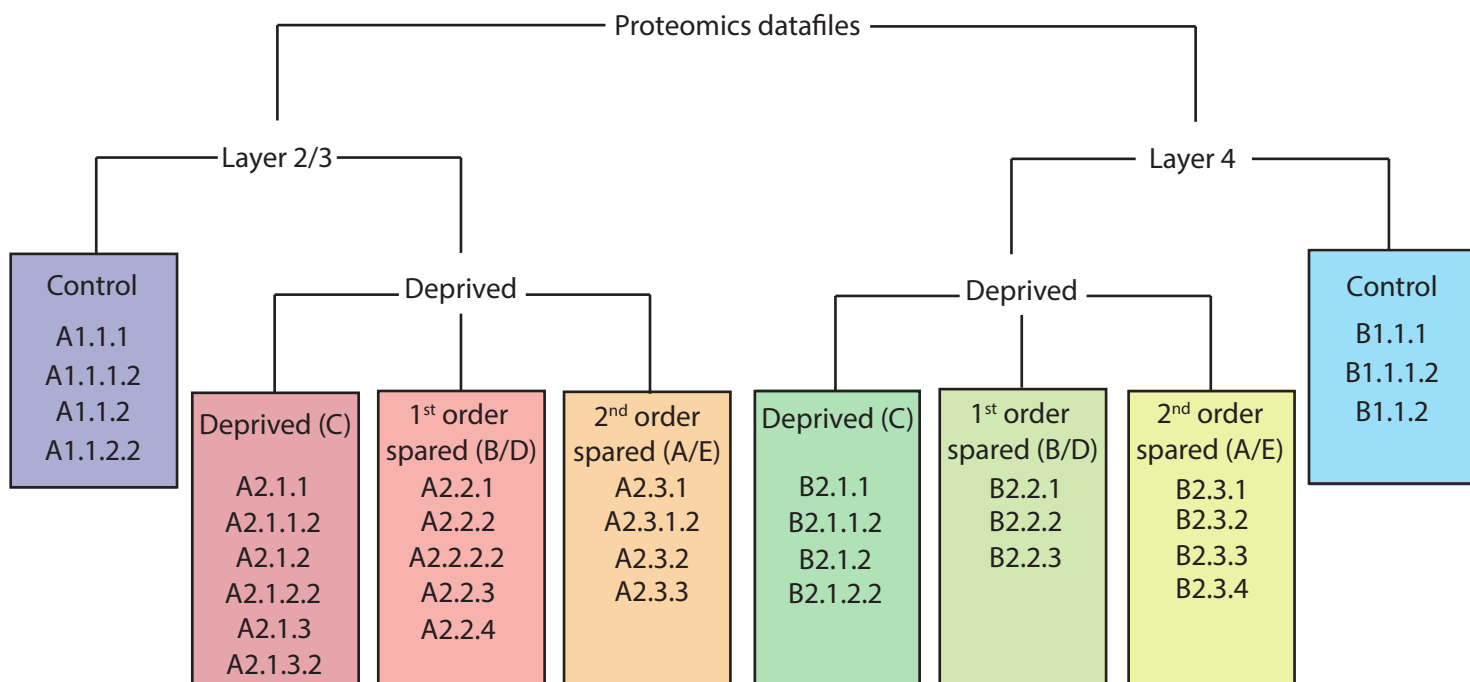

Figure 2

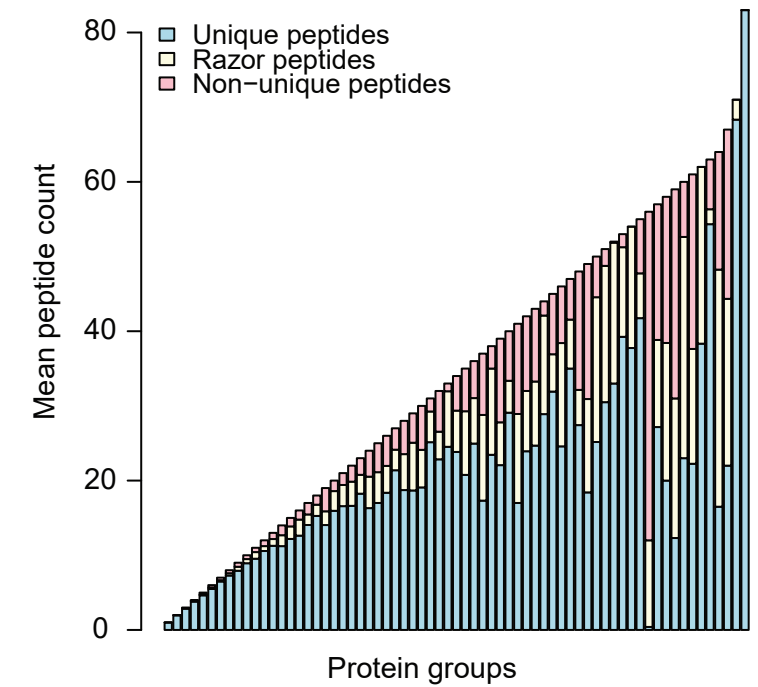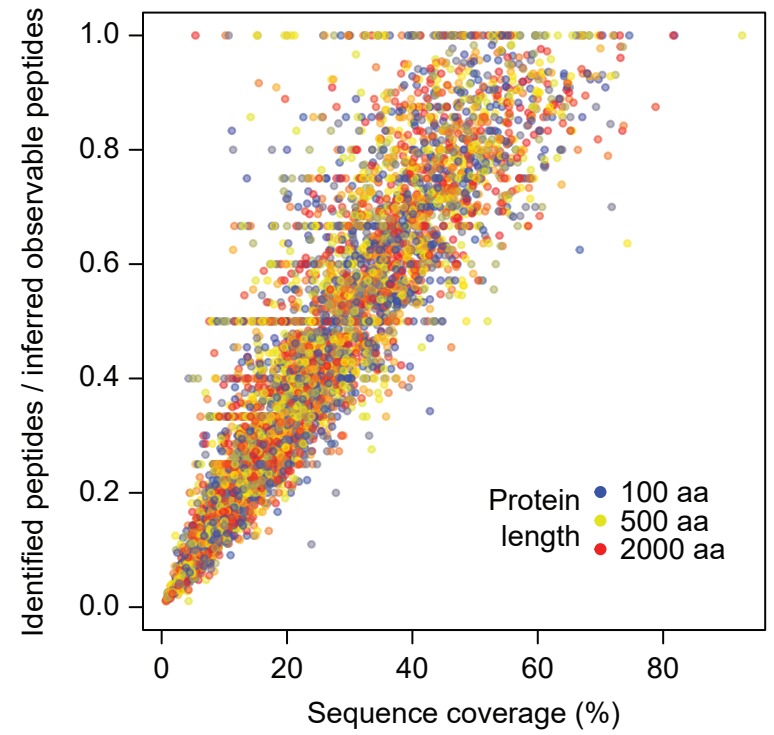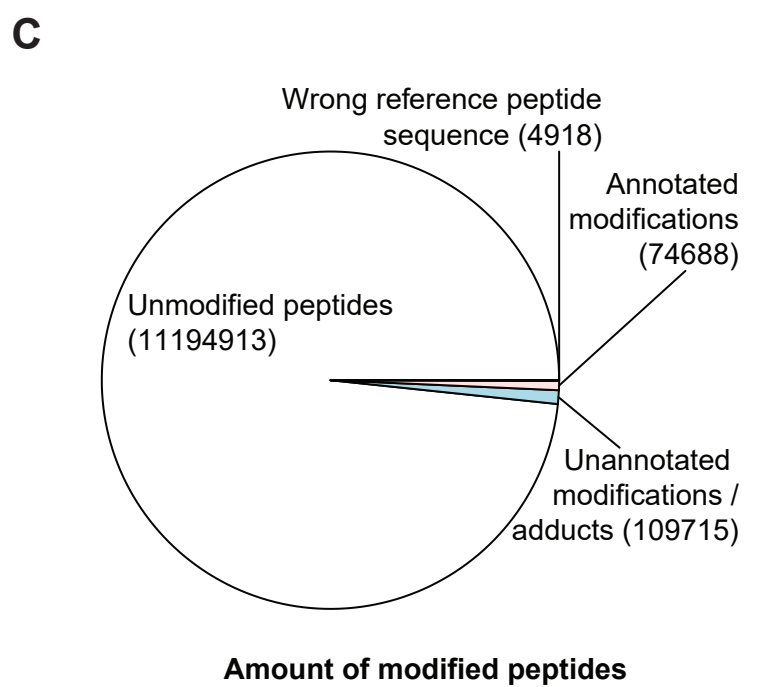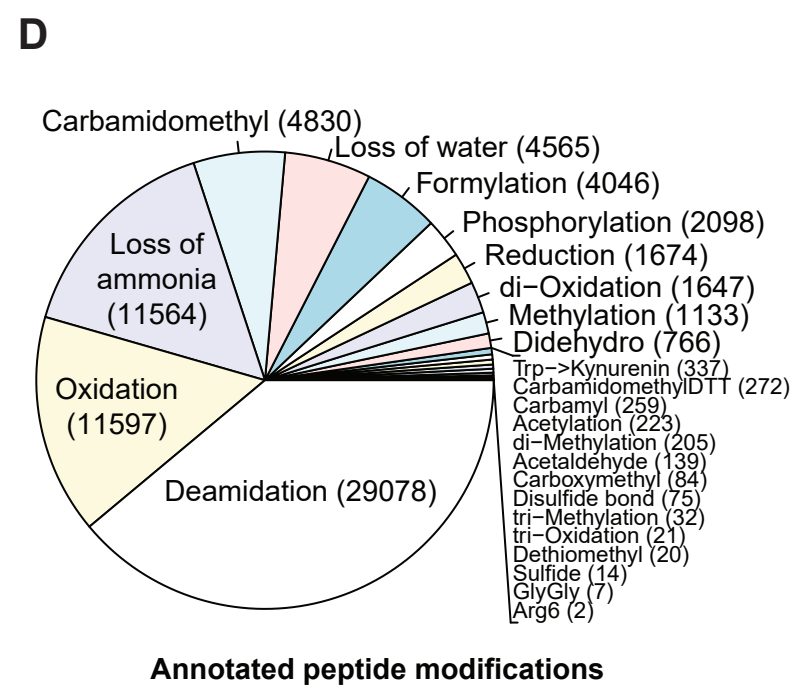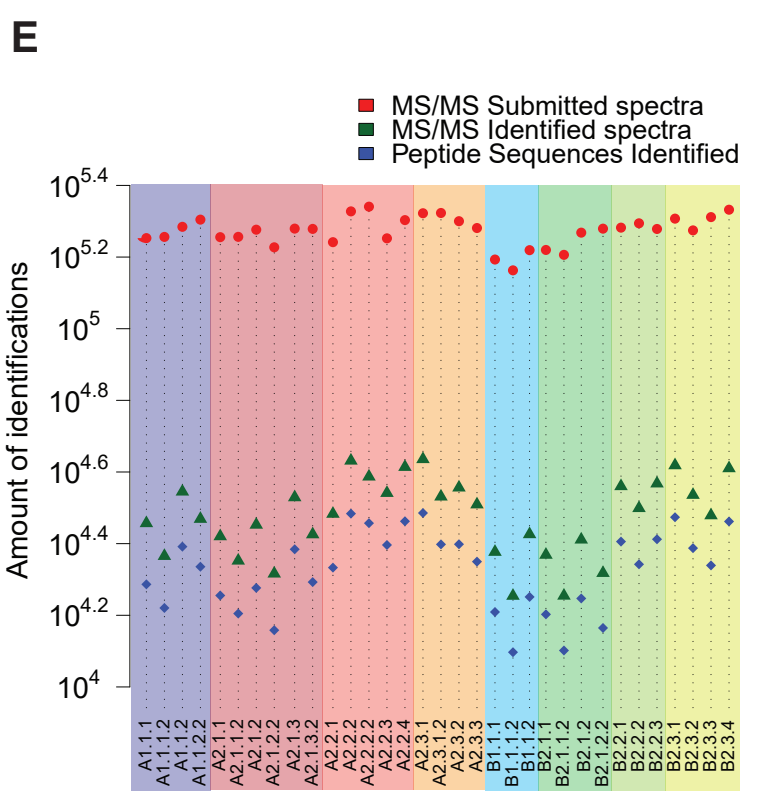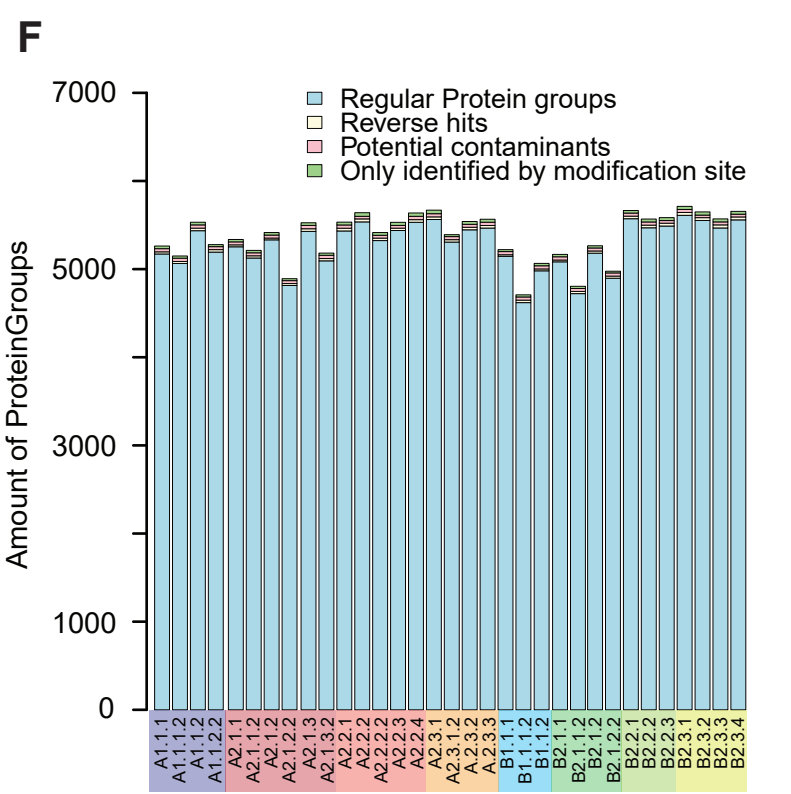

Figure 3

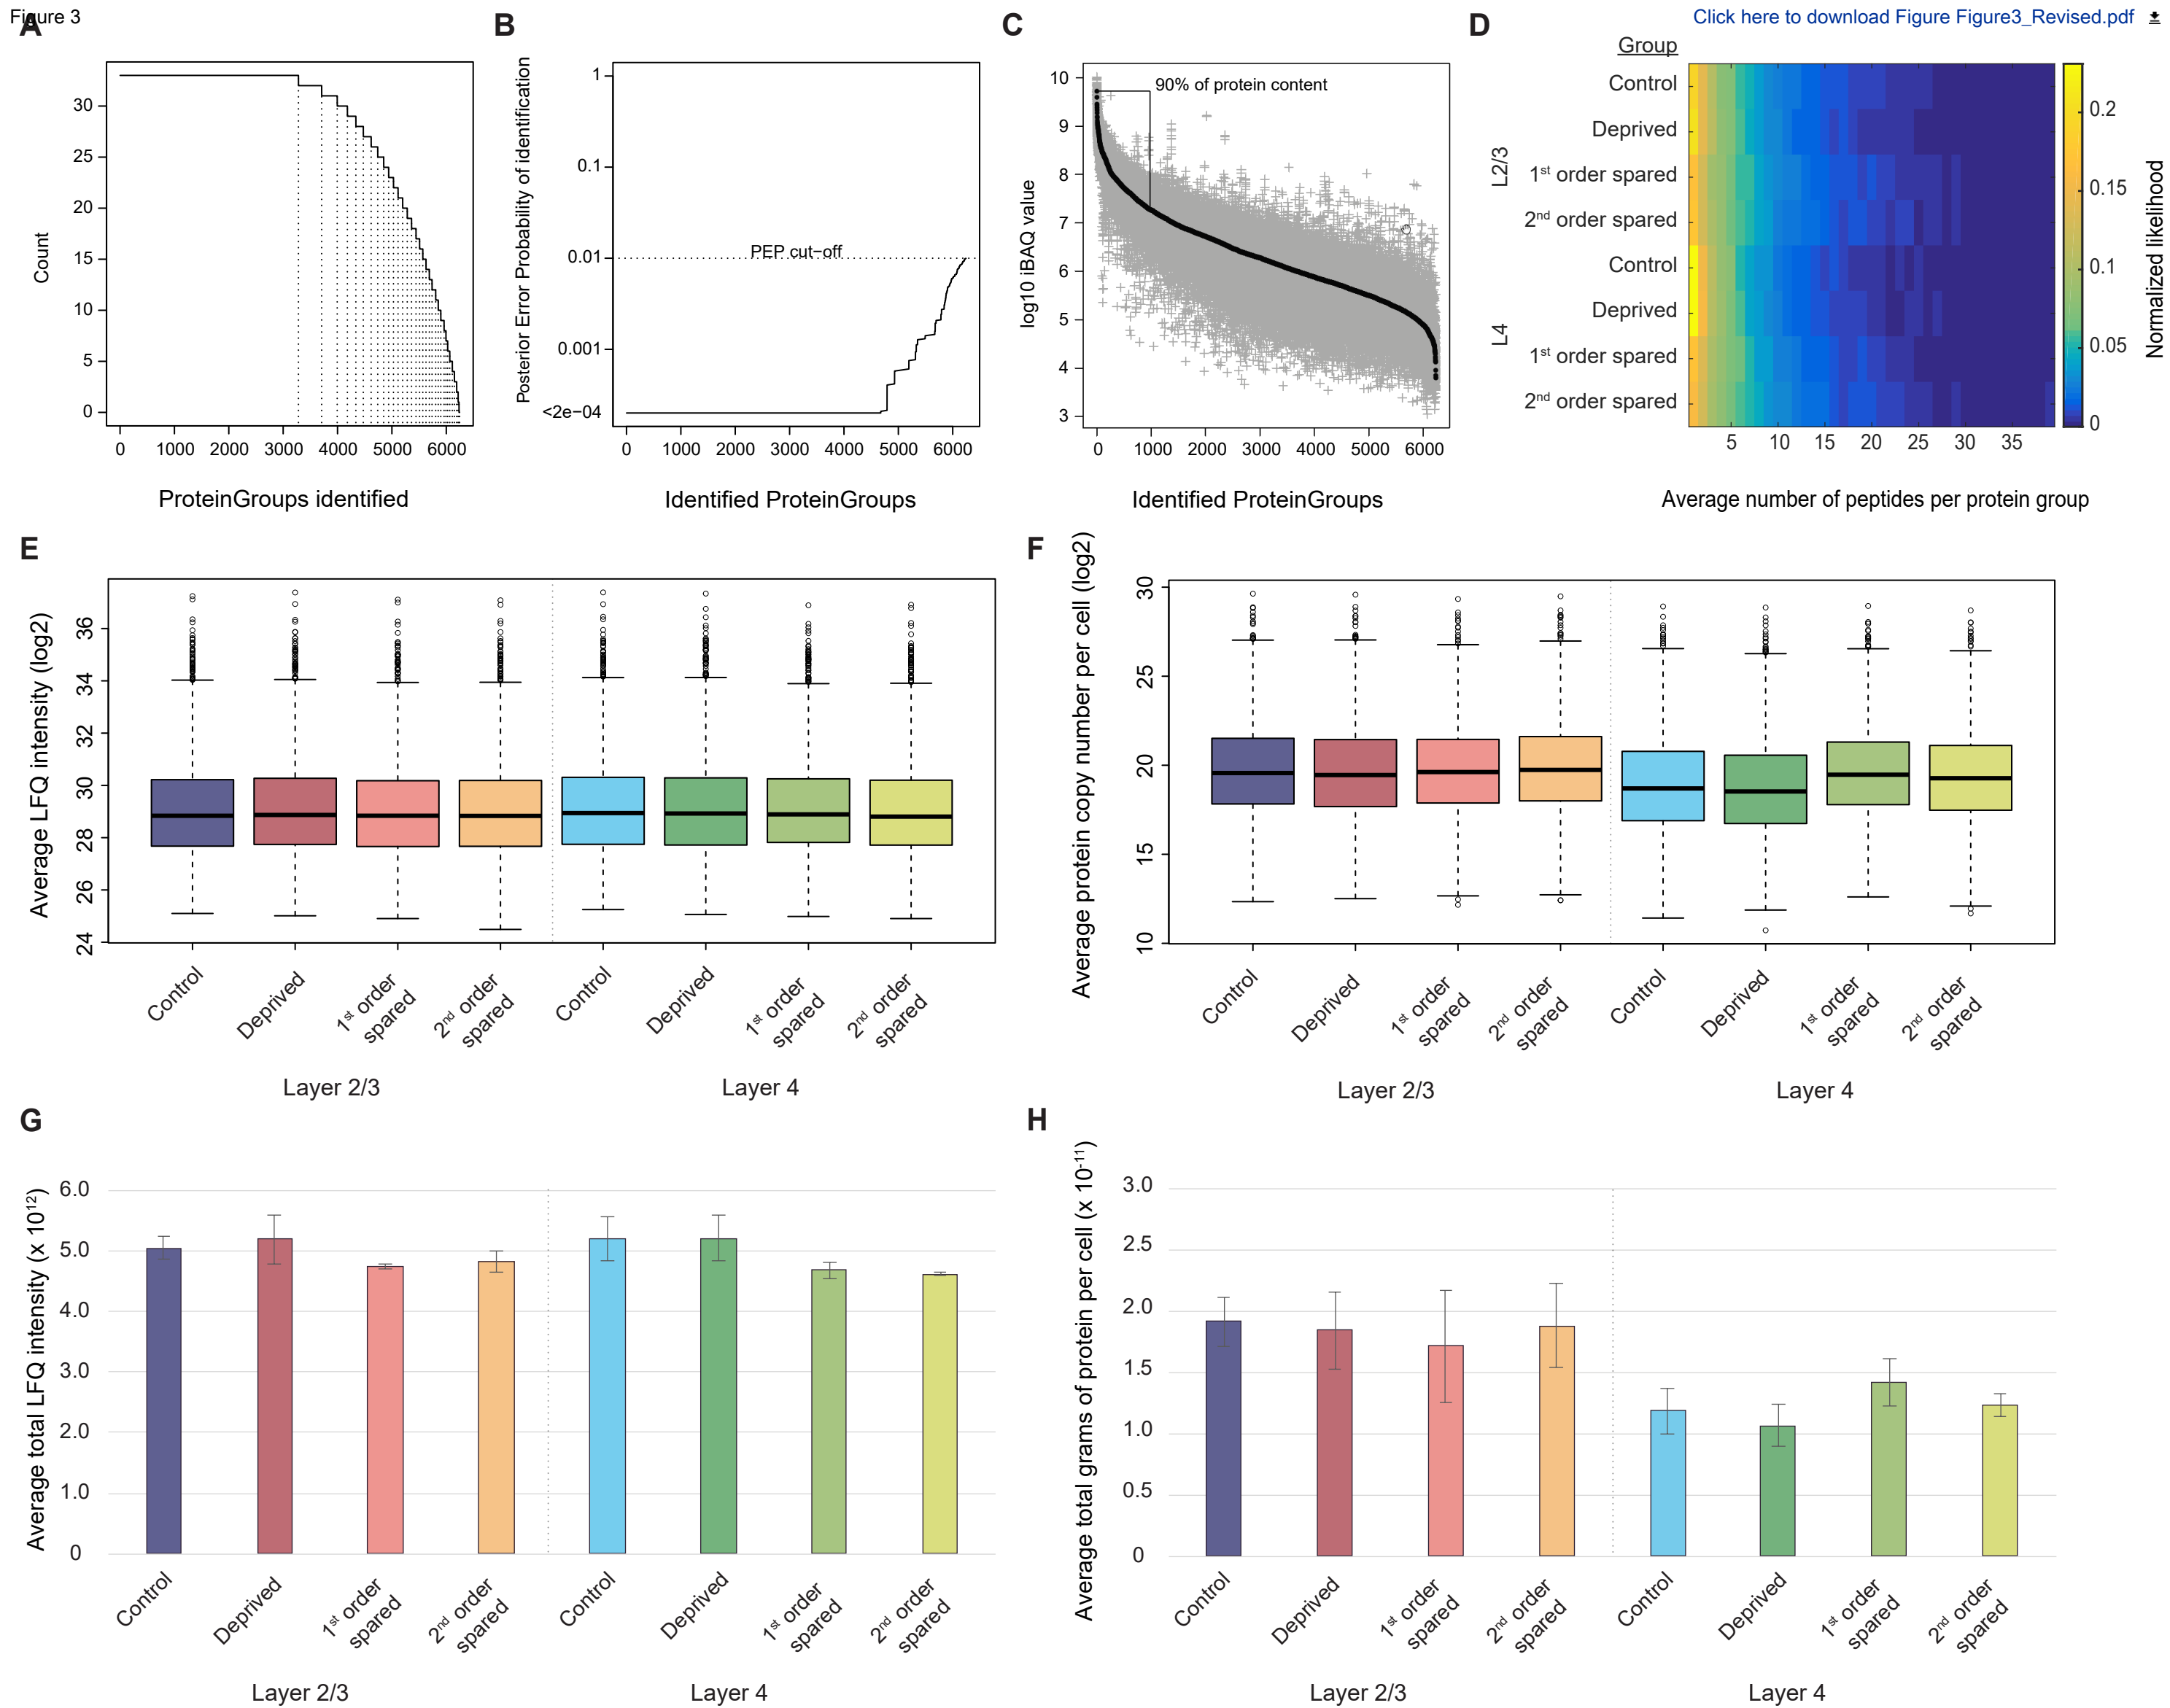

Figure 4

[Click here to download Figure Figure4\\_Revised.pdf](#)**A**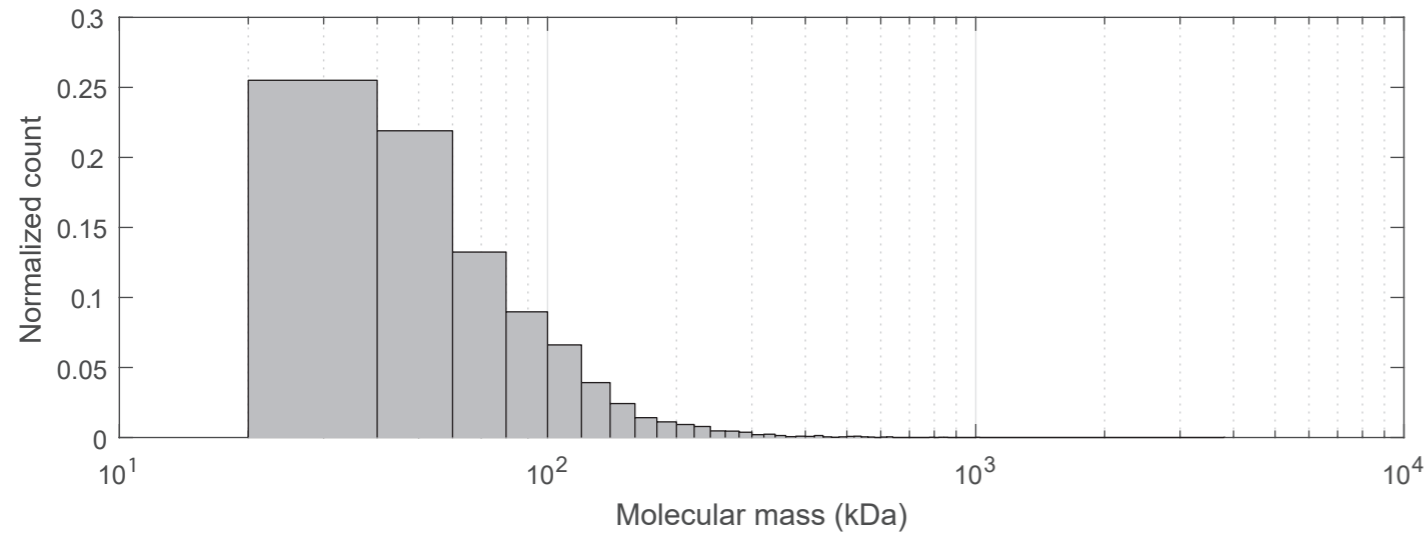**B**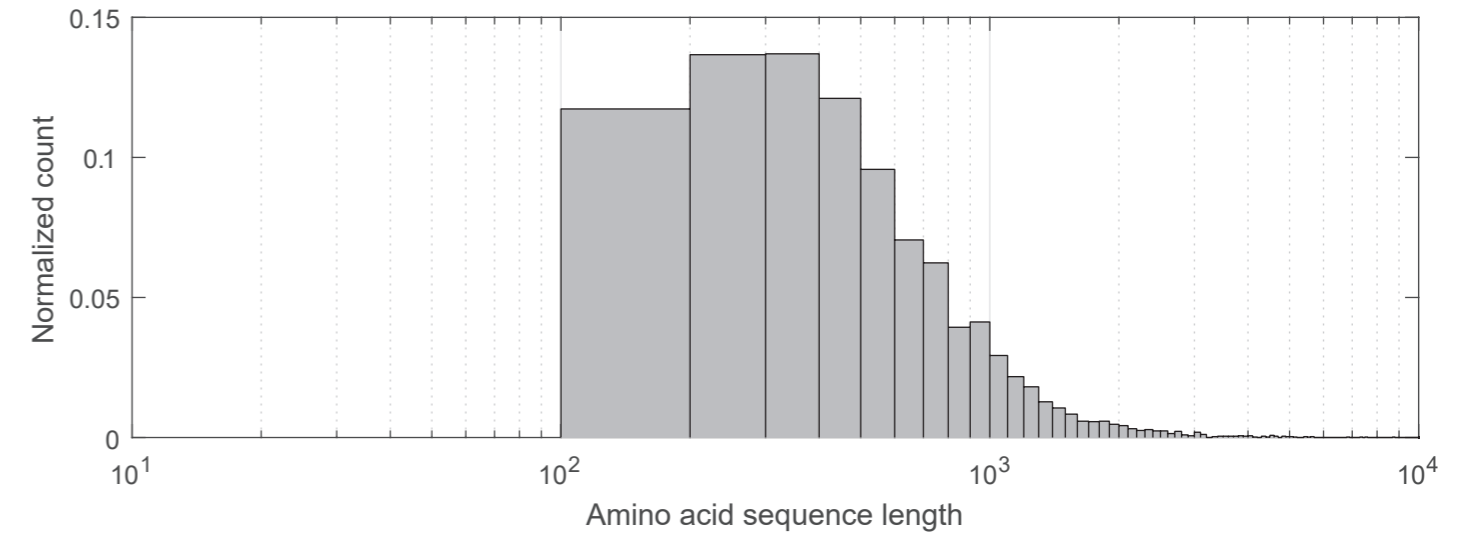**C**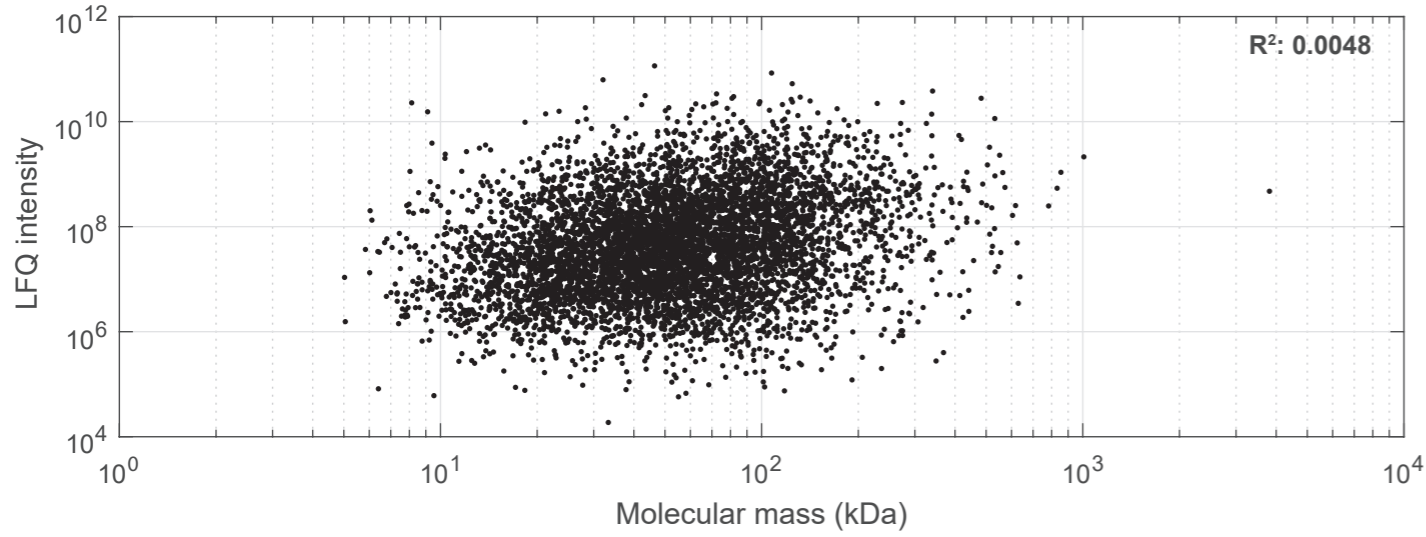**D**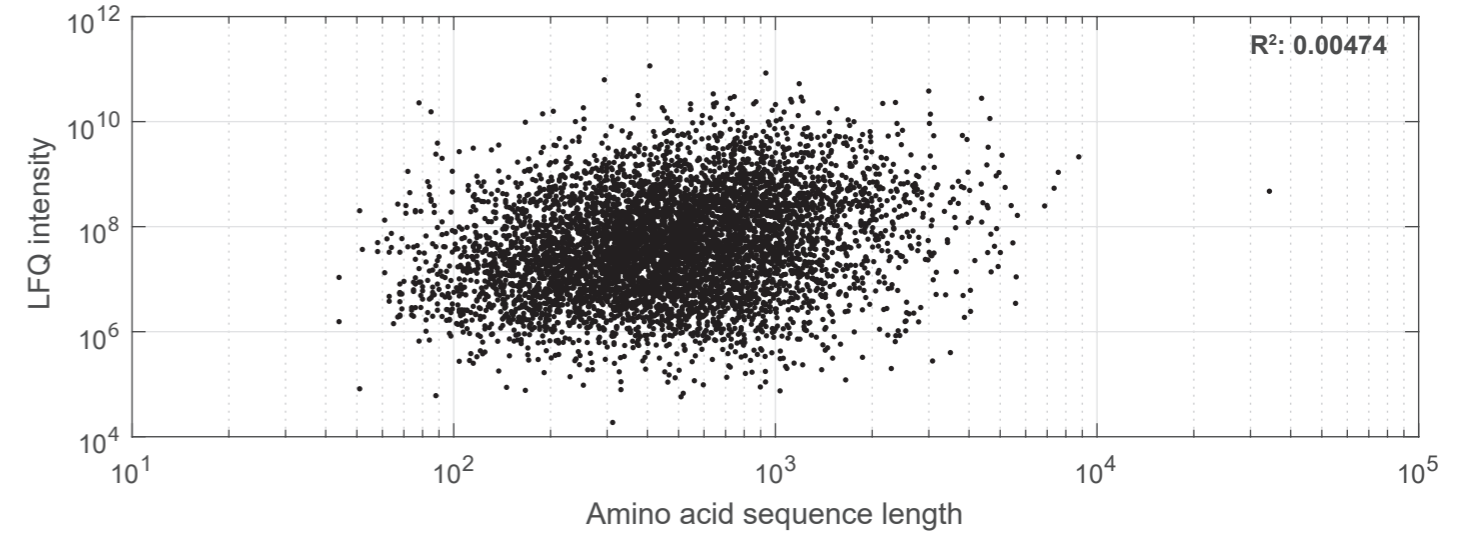**E**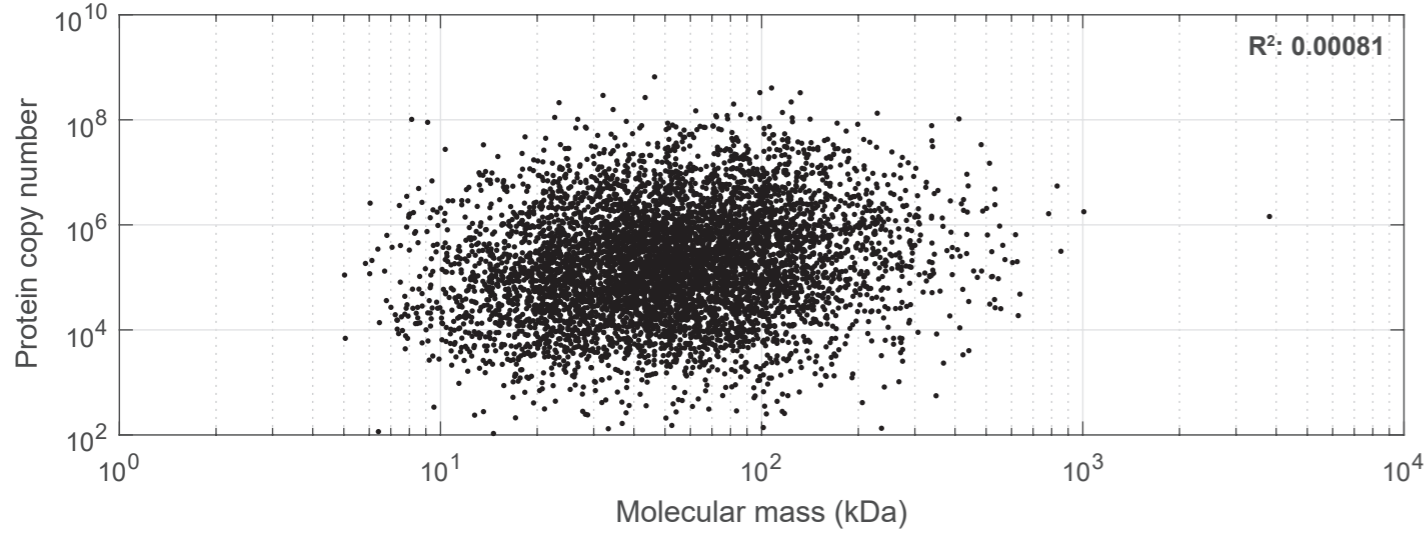**F**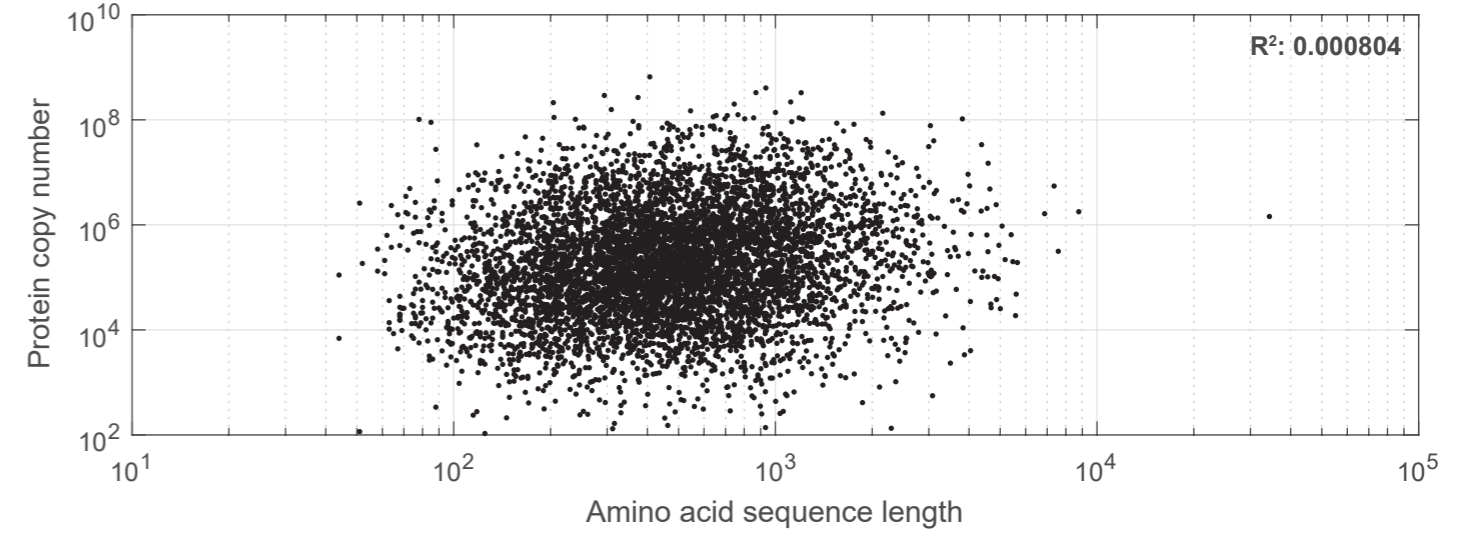

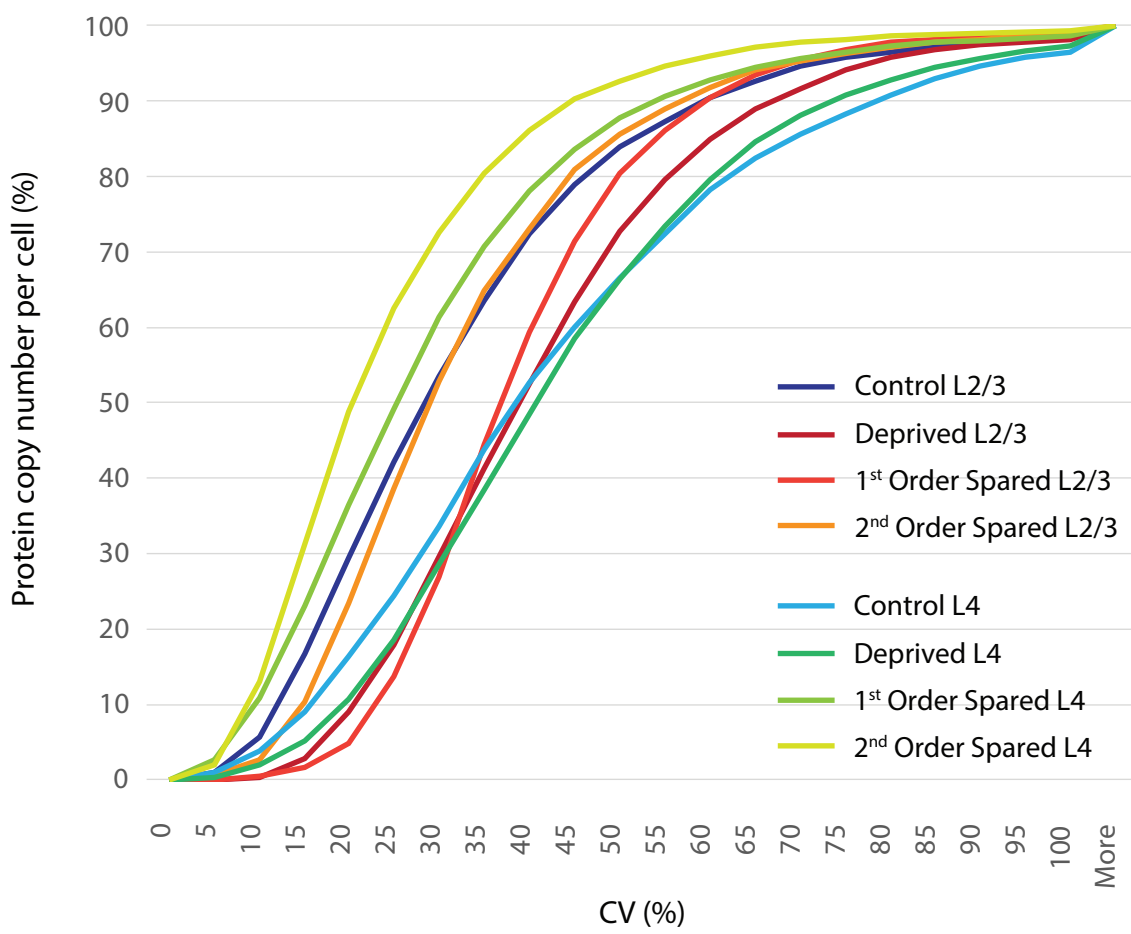**B**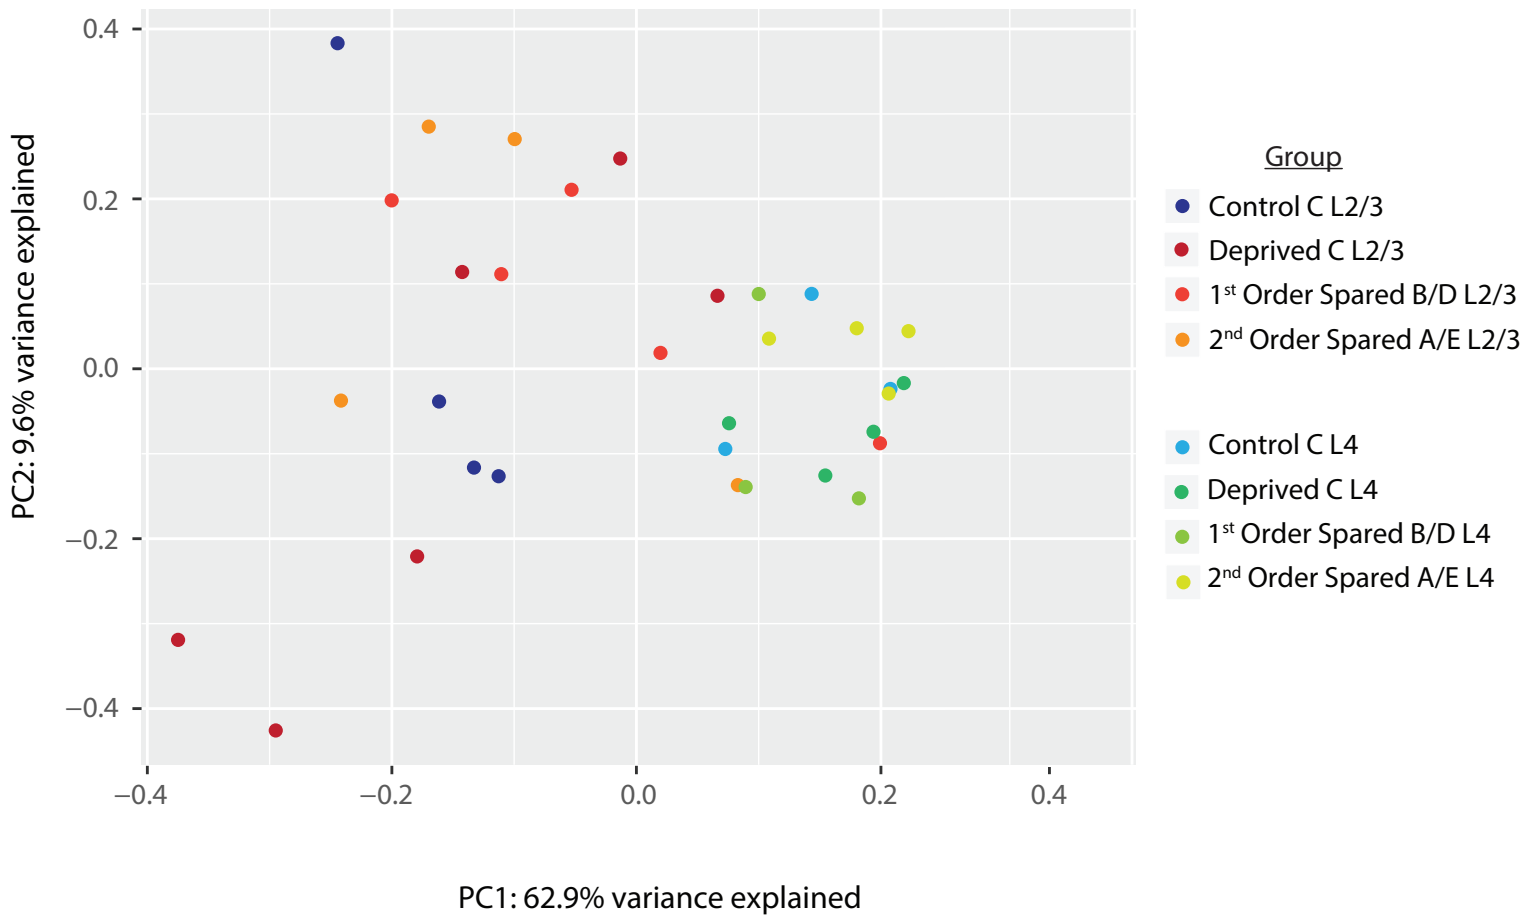**C**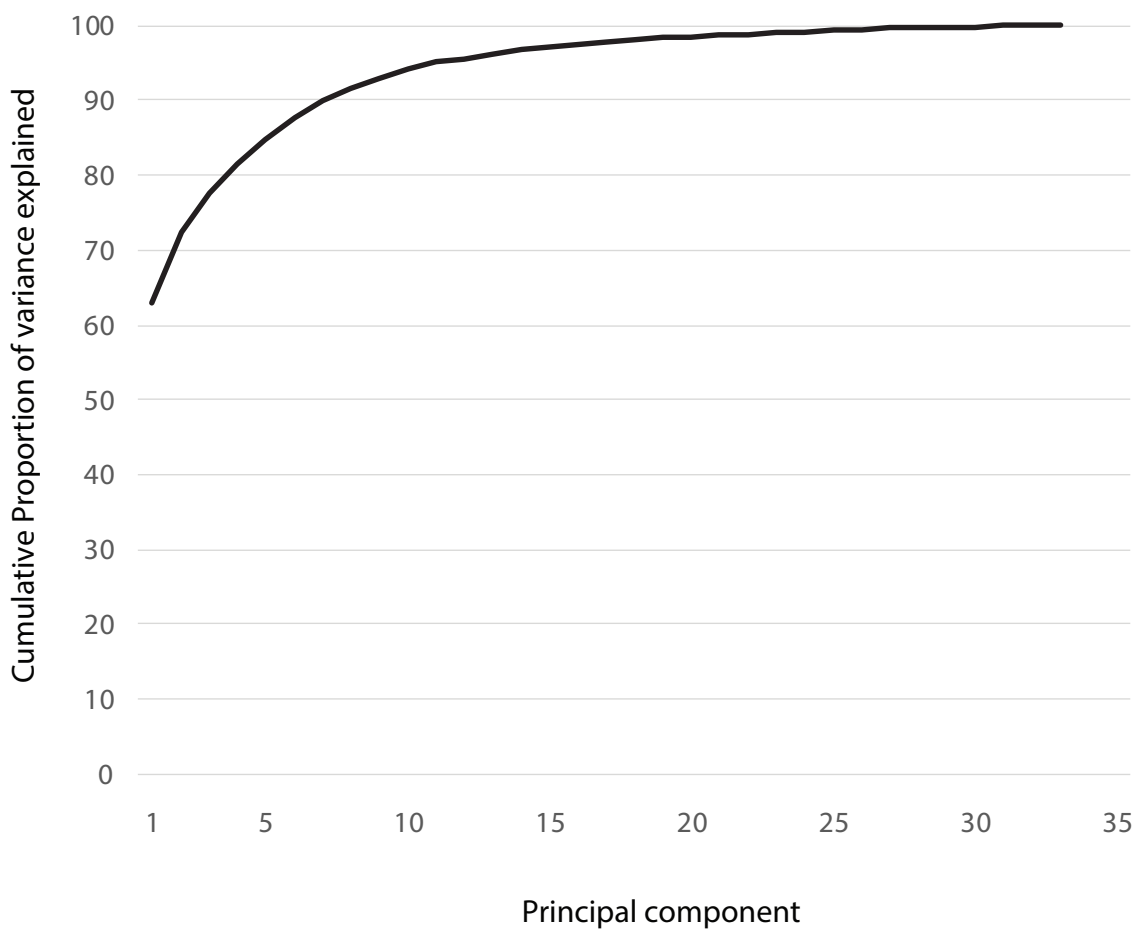

Figure 6

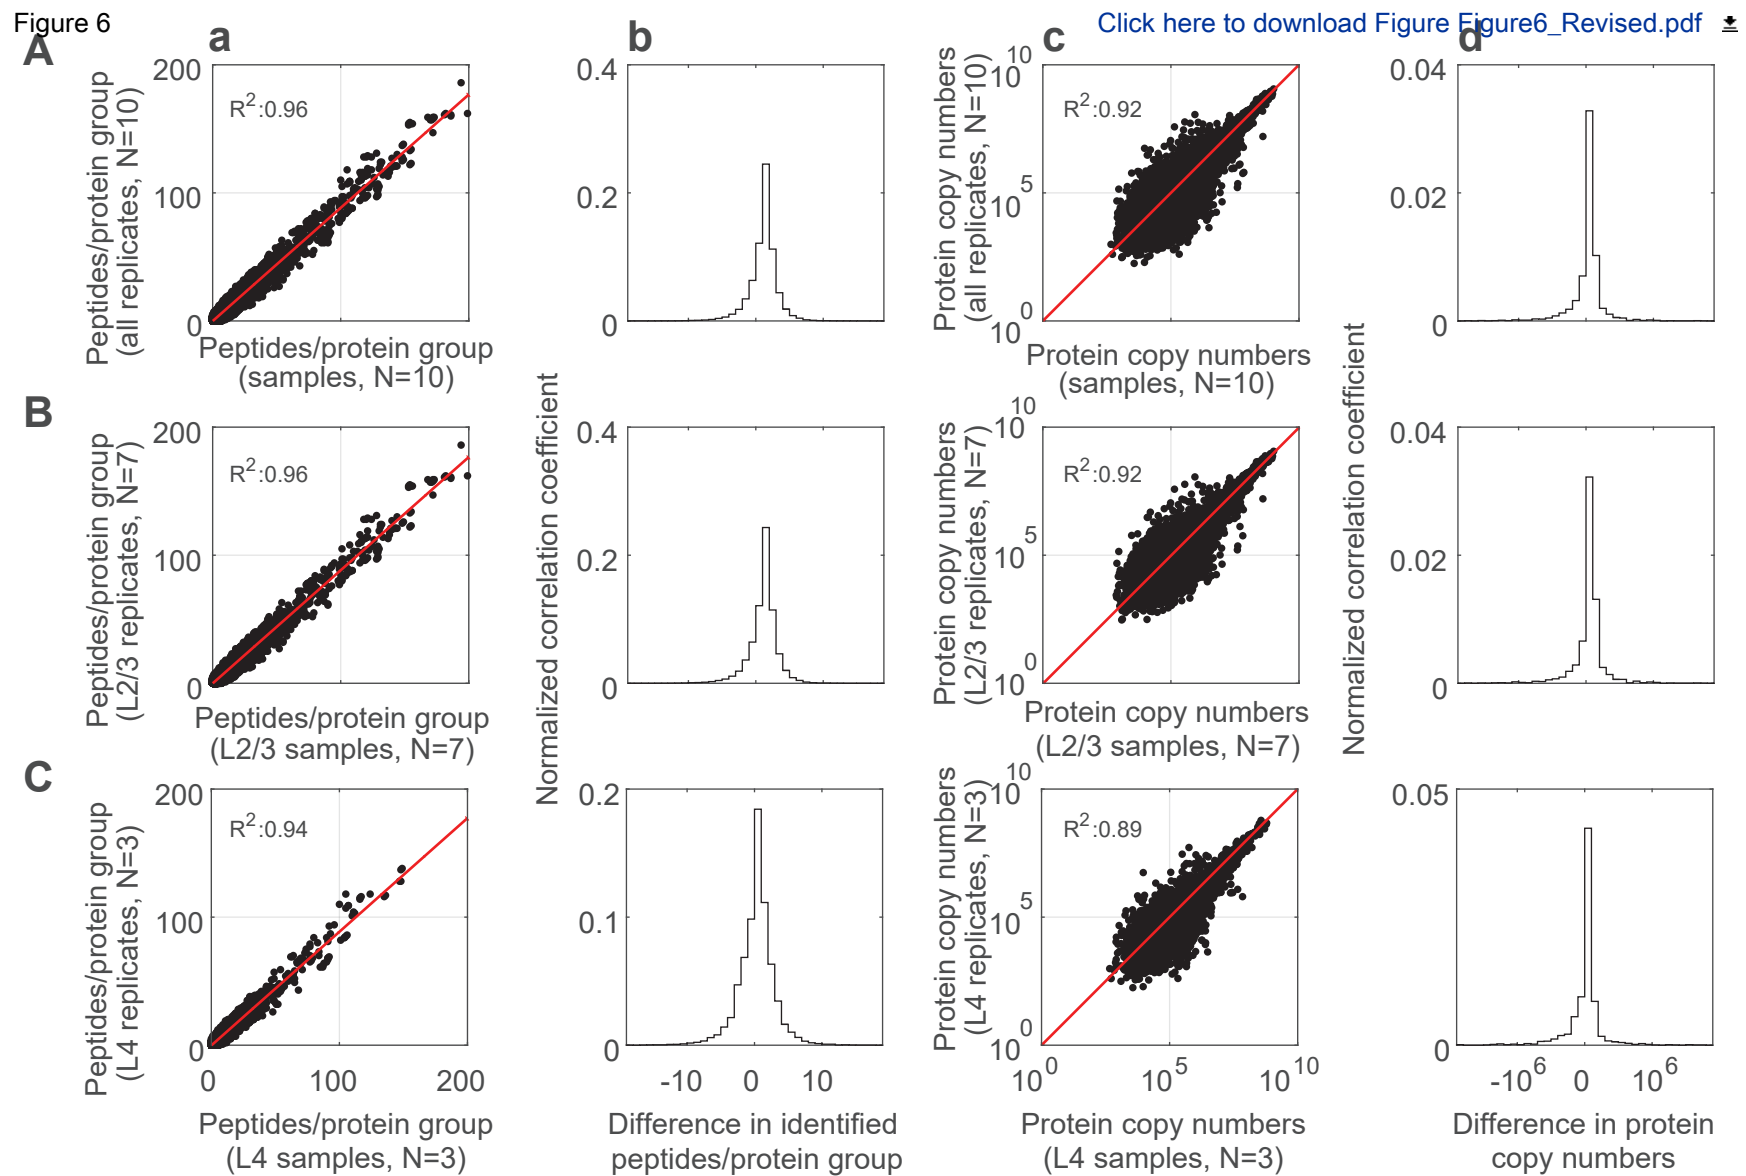





Click here to access/download  
**Supplementary Material**  
Supplemental\_Figure1.pdf



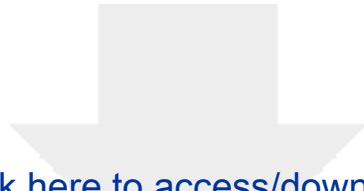

Click here to access/download  
**Supplementary Material**  
Supplemental\_Figure2\_Vertical.pdf

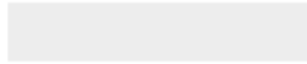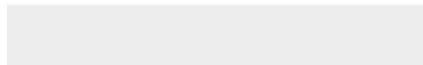

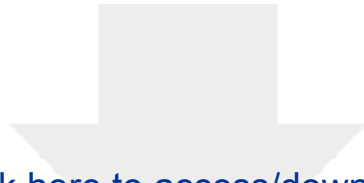

Click here to access/download  
**Supplementary Material**  
Supplemental\_Figure3\_Revised.pdf





Click here to access/download  
**Supplementary Material**  
Supplemental\_Figure4\_Revised.pdf



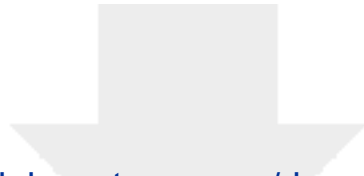

Click here to access/download  
**Supplementary Material**  
Supplemental\_Table1\_Revised.pdf

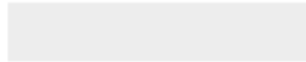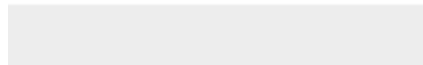



[Click here to access/download](#)

**Supplementary Material**

[Supplemental\\_Table2\\_RCommandline\\_Fig5.txt](#)

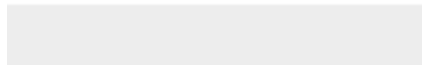

Supplement: gix082_GIGA-D-17-00057_Revision-1.pdf [file gix082_GIGA-D-17-00057_Revision-1.pdf]
